# Supplementary material
Source: HighWire-hosted journal article supplement (https://bmjopen.bmj.com/content/10/1/e032361)
Supplement: inline-supplementary-material-1 [file inline-supplementary-material-1.pdf]

**Online supplementary file 1: Interview Guide***The everyday experience of caring for a person with cancer*

- Could you tell me a bit about your relationship with [patient]?
- Can you tell me about how they were diagnosed with cancer and your initial thoughts and reactions?
- Can you tell me a bit about your experience of caring for someone living with cancer?
- Can you tell me a bit about your caring role? What kinds of things do you do to help care for [patient]?
- Has cancer changed the nature of your relationship with [patient]? If so, how?

*Relationships and living with cancer*

- How did family/loved ones learn about [patient's] cancer and what were their responses?
- Have you seen any relationships change as a result of [patient's] cancer?
- How has caring for [patient] affected your relationship with them?
- How has caring for [patient] affected your life?
- Who else 'helps out'? Is it helpful?
- How does it make [patient] feel to receive care?
- How do you think relationships have affected [patient's] cancer experience?

*The roles of health professionals and experiences of cancer care*

- Could you tell me about the different forms of professional care [patient] has received?
- How have health professionals involved in [patient's] care approached issues around care and treatment, and how have you experienced these communications and interactions?
- As a carer what kinds of questions do you feel comfortable asking health professionals?
- Where have you turned to for information, advice and support?
- Looking back at [patient's] diagnosis, do you feel the same way about cancer now that you did then? What's changed? Why?

*Demographics*

- Sex
- Relationship to the patient
- Patient age, sex, diagnosis and stage
